# Supplementary material
Source: publisher site journal article supplement (https://www.dovepress.com/article/584536)
Supplement: Supplementary file 1 [file 584536%20Revised%20%2509Supplementary%20Material.pdf]

Supplementary Table 1. Primer sequences

| Species      | Gene              | sequences (5'-3')          |
|--------------|-------------------|----------------------------|
|              | hsa-miR-2110-F    | TGCGGTTGGGGAAACGGCCGCTG    |
|              | hsa-miR-2110-R    | CCAGTGCAGGGTCCGAGGT        |
|              | hsa-miR-182-5p-F  | TGCGGTTTGGCAATGGTAGAA      |
|              | hsa-miR-182-5p-R  | CCAGTGCAGGGTCCGAGGT        |
|              | hsa-miR-200b-5p-F | GCCTCTACAGTGCACGTGTCTC     |
|              | hsa-miR-200b-5p-R | CGCTGTTCTCATCTGTCTCGC      |
|              | hsa-miR-345-5p-F  | TCGGCGGCTGACTCCTAGTCCA     |
|              | hsa-miR-345-5p-R  | GTCGTATCCAGTGCAGGGTCCGAGGT |
|              | hsa-miR-191-5p-F  | TGCGCCAACGGAATCCCAAAGC     |
|              | hsa-miR-191-5p-R  | CCAGTGCAGGGTCCGAGGTATT     |
|              | U6-F              | GCTCGCTTCGGCAGCACA         |
|              | U6-R              | AACGCTTCACGAATTTGCGTG      |
|              | IL-6-F            | ACTCACCTCTTCAGAACGAATTG    |
|              | IL-6-R            | CCATCTTTGGAAGGTTTCAGGTTG   |
|              | TNF- $\alpha$ -F  | CCTCTCTCTAATCAGCCCTCTG     |
|              | TNF- $\alpha$ -R  | CCTCTCTCTAATCAGCCCTCTG     |
| Homo sapiens | iNOS-2-F          | TTCAGTATCACAACTCAGCAAG     |
|              | iNOS-2-R          | TGGACCTGCAAGTTAAAATCCC     |
|              | CD206-F           | TAGCCTCGTTTACTGTGCGCA      |
|              | CD206-R           | TGGACTGGGCTGAATGATGT       |
|              | Arg1-F            | AGGCTTGTGATTACCCTCCC       |
|              | Arg1-R            | CGTGGGAGGTCTGACATACA       |
|              | IL-10-F           | GACTTTAAGGGTTACCTGGGTTG    |
|              | IL-10-R           | TCACATGCGCCTTGATGTCTG      |
|              | SRSF1-F           | CCGCAGGGAACAACGATTG        |
|              | SRSF1-R           | GCCGTATTTGTAGAACACGTCCT    |
|              | MAPK1-F           | TACACCAACCTCTCGTACATCG     |
|              | MAPK1-R           | CATGTCTGAAGCGCAGTAAGATT    |
|              | SFPQ-F            | AGCGATGTCGGTTGTTTGTG       |
|              | SFPQ-R            | AGCGAACTCGAAGCTGTCTAC      |
|              | QKI-F             | AAGCCCACCCAGATTACCT        |
|              | QKI-R             | ACTCTGCTAATTTCTTCGTCCAG    |
|              | GAPDH-F           | GAAGGTGAAGGTCGGAGT         |
|              | GAPDH-R           | GAAGATGGTGATGGGATTTC       |
|              | IL-6-F            | CTGCAAGAGACTTCCATCCAG      |
|              | IL-6-R            | AGTGGTATAGACAGGTCTGTTGG    |
|              | TNF- $\alpha$ -F  | CAGGCGGTGCCTATGTCTC        |
| Mus musculus | TNF- $\alpha$ -R  | CGATCACCCCGAAGTTCAGTAG     |
|              | iNOS-2-F          | GTTCTCAGCCCAACAATAACAAGA   |
|              | iNOS-2-R          | GTGGACGGGTCGATGTCAC        |
|              | CD206-F           | CTCTGTTTCAGCTATTGGACGC     |
|              | CD206-R           | TGGCACTCCCAAACATAATTTGA    |

|            |                           |
|------------|---------------------------|
| Arg1-F     | CTCCAAGCCAAAGTCCTTAGAG    |
| Arg1-R     | GGAGCTGTCATTAGGGACATCA    |
| IL-10-F    | CTTACTGACTGGCATGAGGATCA   |
| IL-10-R    | GCAGCTCTAGGAGCATGTGG      |
| GAPDH-F    | AGGTCCGGTGTGAACGGATTTG    |
| GAPDH-R    | GGGGTCGTTGATGGCAACA       |
| miR-2110-F | TGCGGTTGGGGAAACGGCCGCTG   |
| miR-2110-R | CCAGTGCAGGGTCCGAGGT       |
| U6-F       | CAGCACATATACTAAAATTGGAACG |
| U6-R       | ACGAATTTGCGTGTCATCC       |

---
